# Supplementary material for: Fat mass and fat distribution are associated with low back pain intensity and disability: results from a cohort study
Source: PubMed Central journal article supplement (PMC5301404; doi:10.1186/s13075-017-1242-z), 2017-02-10
Supplement: 13075_2017_1242_MOESM2_ESM.pdf [file 13075_2017_1242_MOESM2_ESM.pdf]

|  |  |  |  |  |  |  |  |
|--|--|--|--|--|--|--|--|
|  |  |  |  |  |  |  |  |
|--|--|--|--|--|--|--|--|

### LOW BACK PAIN

#### How to complete this form:

Please complete this form carefully using black ballpoint pen (not felt). Alternatively use blue pen.

Most questions only require you to answer by marking the appropriate box or boxes with a Cross like this:

Please do not mark any areas outside the box.

Other questions will require a numeric answer and can be filled in like this: 

|   |   |   |
|---|---|---|
| 1 | 2 | 3 |
|---|---|---|

If you make a mistake when writing, cross it out with one thick line and write your correct answer above the box.

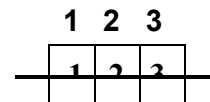

If you make a mistake, place a diagonal line through the incorrect answer like this:  and then put a cross in the appropriate box of your preferred response.  Yes  No

Please do not cross the number 7 (eg. 7̄). Please make sure to write only one number in each space provided, as demonstrated in the example above.

#### We are interested in learning about the health of your lower back/spine.

We have defined low back pain as discomfort or pain occurring in the boxed area shown on the body diagram below. Please refer to this when answering each of the following questions.

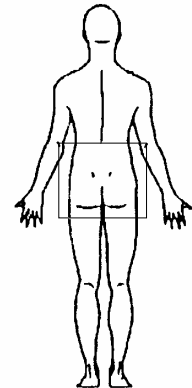

Please put a cross in one box for each question

**Q 1.** Have you ever experienced low back pain?  Yes  No

**Q 2.** Have you had back pain (please complete each of the following (a to f)):

|                                  | Yes                      | No                       |
|----------------------------------|--------------------------|--------------------------|
| <b>a)</b> in the past 24 hours?  | <input type="checkbox"/> | <input type="checkbox"/> |
| <b>b)</b> in the past 2 weeks?   | <input type="checkbox"/> | <input type="checkbox"/> |
| <b>c)</b> in the past month?     | <input type="checkbox"/> | <input type="checkbox"/> |
| <b>d)</b> in the past 6 months?  | <input type="checkbox"/> | <input type="checkbox"/> |
| <b>e)</b> in the past 12 months? | <input type="checkbox"/> | <input type="checkbox"/> |
| <b>f)</b> during your lifetime?  | <input type="checkbox"/> | <input type="checkbox"/> |

**Q 3.** Do you have low back pain now?  Yes  No

## PAIN INTENSITY

We are interested to know more about the intensity of your back pain.

The following questionnaire is the **Chronic Back Pain Grade Questionnaire** which assesses pain intensity.

For the following questions with a scale of 0-10, please place a cross in **ONE** box only

Please complete this questionnaire even if you do NOT experience back pain.

### Q 4.

**A.** How would you rate your back pain on a 0-10 scale at the present time, which is right now, where 0 is 'no pain' and 10 is 'pain as bad as could be'?

No Pain

Pain as bad  
as could be

|                          |                          |                          |                          |                          |                          |                          |                          |                          |                          |                          |
|--------------------------|--------------------------|--------------------------|--------------------------|--------------------------|--------------------------|--------------------------|--------------------------|--------------------------|--------------------------|--------------------------|
| <input type="checkbox"/> | <input type="checkbox"/> | <input type="checkbox"/> | <input type="checkbox"/> | <input type="checkbox"/> | <input type="checkbox"/> | <input type="checkbox"/> | <input type="checkbox"/> | <input type="checkbox"/> | <input type="checkbox"/> | <input type="checkbox"/> |
| 0                        | 1                        | 2                        | 3                        | 4                        | 5                        | 6                        | 7                        | 8                        | 9                        | 10                       |

**B.** In the past 6 months, how intense was your worst pain rated on a 0-10 scale where 0 is 'no pain' and 10 is 'pain as bad as could be'?

No Pain

Pain as bad  
as could be

|                          |                          |                          |                          |                          |                          |                          |                          |                          |                          |                          |
|--------------------------|--------------------------|--------------------------|--------------------------|--------------------------|--------------------------|--------------------------|--------------------------|--------------------------|--------------------------|--------------------------|
| <input type="checkbox"/> | <input type="checkbox"/> | <input type="checkbox"/> | <input type="checkbox"/> | <input type="checkbox"/> | <input type="checkbox"/> | <input type="checkbox"/> | <input type="checkbox"/> | <input type="checkbox"/> | <input type="checkbox"/> | <input type="checkbox"/> |
| 0                        | 1                        | 2                        | 3                        | 4                        | 5                        | 6                        | 7                        | 8                        | 9                        | 10                       |

**C.** In the past 6 months, on the average, how intense was your pain rated on a 0-10 scale where 0 is 'no pain' and 10 is 'pain as bad as could be'? (That is, your usual pain at times you were experiencing pain.)

No Pain.

Pain as bad  
as could be

|                          |                          |                          |                          |                          |                          |                          |                          |                          |                          |                          |
|--------------------------|--------------------------|--------------------------|--------------------------|--------------------------|--------------------------|--------------------------|--------------------------|--------------------------|--------------------------|--------------------------|
| <input type="checkbox"/> | <input type="checkbox"/> | <input type="checkbox"/> | <input type="checkbox"/> | <input type="checkbox"/> | <input type="checkbox"/> | <input type="checkbox"/> | <input type="checkbox"/> | <input type="checkbox"/> | <input type="checkbox"/> | <input type="checkbox"/> |
| 0                        | 1                        | 2                        | 3                        | 4                        | 5                        | 6                        | 7                        | 8                        | 9                        | 10                       |

**D.** About how many days in the last 6 months have you been kept from your usual activities (work, school or housework) because of back pain?

|                                                         |                                                         |                                                         |                 |
|---------------------------------------------------------|---------------------------------------------------------|---------------------------------------------------------|-----------------|
| <input style="width: 20px; height: 20px;" type="text"/> | <input style="width: 20px; height: 20px;" type="text"/> | <input style="width: 20px; height: 20px;" type="text"/> | Disability Days |
|---------------------------------------------------------|---------------------------------------------------------|---------------------------------------------------------|-----------------|

**E.** In the past 6 months, how much has back pain interfered with your daily activities rated on a 0-10 scale where 0 is 'no interference' and 10 is 'unable to carry on any activities'?

Interference

Unable to carry  
on any activities

|                          |                          |                          |                          |                          |                          |                          |                          |                          |                          |                          |
|--------------------------|--------------------------|--------------------------|--------------------------|--------------------------|--------------------------|--------------------------|--------------------------|--------------------------|--------------------------|--------------------------|
| <input type="checkbox"/> | <input type="checkbox"/> | <input type="checkbox"/> | <input type="checkbox"/> | <input type="checkbox"/> | <input type="checkbox"/> | <input type="checkbox"/> | <input type="checkbox"/> | <input type="checkbox"/> | <input type="checkbox"/> | <input type="checkbox"/> |
| 0                        | 1                        | 2                        | 3                        | 4                        | 5                        | 6                        | 7                        | 8                        | 9                        | 10                       |

**F.** In the past 6 months, how much has back pain changed your ability to take part in recreational, social and family activities where 0 is 'no change' and 10 is 'extreme change'?

No Change

Extreme  
change

|                          |                          |                          |                          |                          |                          |                          |                          |                          |                          |                          |
|--------------------------|--------------------------|--------------------------|--------------------------|--------------------------|--------------------------|--------------------------|--------------------------|--------------------------|--------------------------|--------------------------|
| <input type="checkbox"/> | <input type="checkbox"/> | <input type="checkbox"/> | <input type="checkbox"/> | <input type="checkbox"/> | <input type="checkbox"/> | <input type="checkbox"/> | <input type="checkbox"/> | <input type="checkbox"/> | <input type="checkbox"/> | <input type="checkbox"/> |
| 0                        | 1                        | 2                        | 3                        | 4                        | 5                        | 6                        | 7                        | 8                        | 9                        | 10                       |

**G.** In the past 6 months, how much has back pain changed your ability to work (including housework) where 0 is 'no change' and 10 is 'extreme change'?

No Change

Extreme  
change

|                          |                          |                          |                          |                          |                          |                          |                          |                          |                          |                          |
|--------------------------|--------------------------|--------------------------|--------------------------|--------------------------|--------------------------|--------------------------|--------------------------|--------------------------|--------------------------|--------------------------|
| <input type="checkbox"/> | <input type="checkbox"/> | <input type="checkbox"/> | <input type="checkbox"/> | <input type="checkbox"/> | <input type="checkbox"/> | <input type="checkbox"/> | <input type="checkbox"/> | <input type="checkbox"/> | <input type="checkbox"/> | <input type="checkbox"/> |
| 0                        | 1                        | 2                        | 3                        | 4                        | 5                        | 6                        | 7                        | 8                        | 9                        | 10                       |
